# Supplementary material for: Obesity causes mitochondrial fragmentation and dysfunction in white adipocytes due to RalA activation
Source: PubMed Central journal article supplement (PMC10896723; doi:10.1038/s42255-024-00978-0), 2024-01-29
Supplement: 42255_2024_978_MOESM1_ESM.pdf [file 42255_2024_978_MOESM1_ESM.pdf]

## Reporting Summary

Nature Portfolio wishes to improve the reproducibility of the work that we publish. This form provides structure for consistency and transparency in reporting. For further information on Nature Portfolio policies, see our [Editorial Policies](#) and the [Editorial Policy Checklist](#).

### Statistics

For all statistical analyses, confirm that the following items are present in the figure legend, table legend, main text, or Methods section.

- | n/a                                 | Confirmed                                                                                                                                                                                                                                                                                      |
|-------------------------------------|------------------------------------------------------------------------------------------------------------------------------------------------------------------------------------------------------------------------------------------------------------------------------------------------|
| <input type="checkbox"/>            | <input checked="" type="checkbox"/> The exact sample size ( $n$ ) for each experimental group/condition, given as a discrete number and unit of measurement                                                                                                                                    |
| <input type="checkbox"/>            | <input checked="" type="checkbox"/> A statement on whether measurements were taken from distinct samples or whether the same sample was measured repeatedly                                                                                                                                    |
| <input type="checkbox"/>            | <input checked="" type="checkbox"/> The statistical test(s) used AND whether they are one- or two-sided<br><i>Only common tests should be described solely by name; describe more complex techniques in the Methods section.</i>                                                               |
| <input type="checkbox"/>            | <input checked="" type="checkbox"/> A description of all covariates tested                                                                                                                                                                                                                     |
| <input type="checkbox"/>            | <input checked="" type="checkbox"/> A description of any assumptions or corrections, such as tests of normality and adjustment for multiple comparisons                                                                                                                                        |
| <input type="checkbox"/>            | <input checked="" type="checkbox"/> A full description of the statistical parameters including central tendency (e.g. means) or other basic estimates (e.g. regression coefficient) AND variation (e.g. standard deviation) or associated estimates of uncertainty (e.g. confidence intervals) |
| <input checked="" type="checkbox"/> | <input type="checkbox"/> For null hypothesis testing, the test statistic (e.g. $F$ , $t$ , $r$ ) with confidence intervals, effect sizes, degrees of freedom and $P$ value noted<br><i>Give <math>P</math> values as exact values whenever suitable.</i>                                       |
| <input checked="" type="checkbox"/> | <input type="checkbox"/> For Bayesian analysis, information on the choice of priors and Markov chain Monte Carlo settings                                                                                                                                                                      |
| <input checked="" type="checkbox"/> | <input type="checkbox"/> For hierarchical and complex designs, identification of the appropriate level for tests and full reporting of outcomes                                                                                                                                                |
| <input checked="" type="checkbox"/> | <input type="checkbox"/> Estimates of effect sizes (e.g. Cohen's $d$ , Pearson's $r$ ), indicating how they were calculated                                                                                                                                                                    |

*Our web collection on [statistics for biologists](#) contains articles on many of the points above.*

### Software and code

Policy information about [availability of computer code](#)

Data collection EchoMRI v2018, Keyence BZ-X700, iTecan v2.0, Wave Controller for XEF v2.4, NIS-Elements v4.51.01, ExpeData v1.9.27, QuantStudio v1.5.1, NanoDrop2000 v1.3.1, SerialTEM 3.1.1a, Illumina bcl2fastq2 Conversion Software v2.20, LI-COR Odyssey XF Imager, Agilent Seahorse Wave 2.6.1.

Data analysis Microsoft® Excel® for Microsoft 365 MSO (Version 2304 Build 16.0.16327.20200) 64-bit, Fiji ImageJ(v1.52p), Cell Profiler(3.1.5), GraphPad Prism(8.4.3), CalR(v1.3), STAR (version 2.7.2b), GENE-E (v3.0.215), GSEA (4.3.2), ComparativeMarkerSelection module (version 11), Image Studio Lite(V5.2).

For manuscripts utilizing custom algorithms or software that are central to the research but not yet described in published literature, software must be made available to editors and reviewers. We strongly encourage code deposition in a community repository (e.g. GitHub). See the Nature Portfolio [guidelines for submitting code & software](#) for further information.

## Data

Policy information about [availability of data](#)

All manuscripts must include a [data availability statement](#). This statement should provide the following information, where applicable:

- Accession codes, unique identifiers, or web links for publicly available datasets
- A description of any restrictions on data availability
- For clinical datasets or third party data, please ensure that the statement adheres to our [policy](#)

RNA-Seq data reported in this paper have been deposited in NCBI SRA database (BioProject PRJNA727566), human data are deriving from published database GSE25402 and GSE70353, mouse genome sequence information is from BioProject PRJNA20689.

## Research involving human participants, their data, or biological material

Policy information about studies with [human participants or human data](#). See also policy information about [sex, gender \(identity/presentation\), and sexual orientation](#) and [race, ethnicity and racism](#).

|                                                                    |                                                                                                              |
|--------------------------------------------------------------------|--------------------------------------------------------------------------------------------------------------|
| Reporting on sex and gender                                        | All the information about human participants has been previously published and referenced in the manuscript. |
| Reporting on race, ethnicity, or other socially relevant groupings | All the information about human participants has been previously published and referenced in the manuscript. |
| Population characteristics                                         | All the information about human participants has been previously published and referenced in the manuscript. |
| Recruitment                                                        | All the information about human participants has been previously published and referenced in the manuscript. |
| Ethics oversight                                                   | All the information about human participants has been previously published and referenced in the manuscript. |

Note that full information on the approval of the study protocol must also be provided in the manuscript.

## Field-specific reporting

Please select the one below that is the best fit for your research. If you are not sure, read the appropriate sections before making your selection.

Life sciences       Behavioural & social sciences       Ecological, evolutionary & environmental sciences

For a reference copy of the document with all sections, see [nature.com/documents/nr-reporting-summary-flat.pdf](https://www.nature.com/documents/nr-reporting-summary-flat.pdf)

## Life sciences study design

All studies must disclose on these points even when the disclosure is negative.

|                 |                                                                                                                                                                                                                                                                                                                                                                                     |
|-----------------|-------------------------------------------------------------------------------------------------------------------------------------------------------------------------------------------------------------------------------------------------------------------------------------------------------------------------------------------------------------------------------------|
| Sample size     | No predetermination of sample size was performed for animal experiments. Sample size was determined by the available number of age-matched litters. Sample size (n) for each experiment is included in the figure legend. Experiments were performed with at least 2 replicates.                                                                                                    |
| Data exclusions | No data were excluded from analyses.                                                                                                                                                                                                                                                                                                                                                |
| Replication     | For primary cell culture, three independent isolations were performed and similar results were observed. For immortalized cell, three different single cell clone were used and similar results were observed within those clones. Experiments in which statistical analysis was not applicable were repeated at least three times, other experiments were repeated at least twice. |
| Randomization   | For in vivo study, injection order to mice were assigned based on their housing cage and ear tag. For metabolic study, two genotypes were crossly assigned to avoid confounding by cage location effect.                                                                                                                                                                            |
| Blinding        | The researcher was blinded to the genotype during data collection, this includes blinded process of EM sample. During data analysis, the researchers were not blinded to allocation since data comparison needs to be done between different genotypes or groups.                                                                                                                   |

## Reporting for specific materials, systems and methods

We require information from authors about some types of materials, experimental systems and methods used in many studies. Here, indicate whether each material, system or method listed is relevant to your study. If you are not sure if a list item applies to your research, read the appropriate section before selecting a response.

## Materials &amp; experimental systems

| n/a                                 | Involvement                                                     |
|-------------------------------------|-----------------------------------------------------------------|
| <input type="checkbox"/>            | <input checked="" type="checkbox"/> Antibodies                  |
| <input type="checkbox"/>            | <input checked="" type="checkbox"/> Eukaryotic cell lines       |
| <input checked="" type="checkbox"/> | <input type="checkbox"/> Palaeontology and archaeology          |
| <input type="checkbox"/>            | <input checked="" type="checkbox"/> Animals and other organisms |
| <input checked="" type="checkbox"/> | <input type="checkbox"/> Clinical data                          |
| <input checked="" type="checkbox"/> | <input type="checkbox"/> Dual use research of concern           |
| <input checked="" type="checkbox"/> | <input type="checkbox"/> Plants                                 |

## Methods

| n/a                                 | Involvement                                     |
|-------------------------------------|-------------------------------------------------|
| <input checked="" type="checkbox"/> | <input type="checkbox"/> ChIP-seq               |
| <input checked="" type="checkbox"/> | <input type="checkbox"/> Flow cytometry         |
| <input checked="" type="checkbox"/> | <input type="checkbox"/> MRI-based neuroimaging |

## Antibodies

## Antibodies used

OXPHOS (Abcam, ab110413),  $\beta$ -Tubulin (CST 2146S), phospho-Drp1(Ser637) (CST 4867S), phospho-HSL(Ser660) (CST 45804S), HSL (CST 4107S), MYC (CST 2276S), Drp1 (CST 8570S), phospho-AMPK(Thr172) (CST 2535S), AMPK (CST 5831S), RalA (BD Science BD610221),  $\beta$ -Actin (ProteinTech 66009-1-Ig), FLAG (ProteinTech 66008-4-Ig), GFP (ProteinTech 66002-1-Ig), Sec5 (ProteinTech 12751-1-AP), GLUT4 (Millipore 07-1404), IRAP (CST 6918S), Na,K-ATPase (CST 3010S). All primary antibodies for WB was diluted as 1:1000.

## Validation

All antibodies were validated by manufacturer and confirmed with western blot by their expected change upon treatment or in KO cells.

OXPHOS: <https://www.abcam.com/products/panels/total-oxphos-rodent-wb-antibody-cocktail-ab110413.html>

$\beta$ -Tubulin: [https://www.cellsignal.com/products/primary-antibodies/b-tubulin-antibody/2146?site-search-type=Products&N=4294956287&Ntt=2146s&fromPage=plp&\\_requestid=807705](https://www.cellsignal.com/products/primary-antibodies/b-tubulin-antibody/2146?site-search-type=Products&N=4294956287&Ntt=2146s&fromPage=plp&_requestid=807705)

phospho-Drp1(Ser637): [https://www.cellsignal.com/products/primary-antibodies/phospho-drp1-ser637-antibody/4867?site-search-type=Products&N=4294956287&Ntt=4867s&fromPage=plp&\\_requestid=795386](https://www.cellsignal.com/products/primary-antibodies/phospho-drp1-ser637-antibody/4867?site-search-type=Products&N=4294956287&Ntt=4867s&fromPage=plp&_requestid=795386)

phospho-HSL(Ser660): [https://www.cellsignal.com/products/primary-antibodies/phospho-hsl-ser660-antibody/45804?site-search-type=Products&N=4294956287&Ntt=45804s&fromPage=plp&\\_requestid=795885](https://www.cellsignal.com/products/primary-antibodies/phospho-hsl-ser660-antibody/45804?site-search-type=Products&N=4294956287&Ntt=45804s&fromPage=plp&_requestid=795885)

HSL: [https://www.cellsignal.com/products/primary-antibodies/hsl-antibody/4107?site-search-type=Products&N=4294956287&Ntt=4107s&fromPage=plp&\\_requestid=796018](https://www.cellsignal.com/products/primary-antibodies/hsl-antibody/4107?site-search-type=Products&N=4294956287&Ntt=4107s&fromPage=plp&_requestid=796018)

MYC: [https://www.cellsignal.com/products/primary-antibodies/myc-tag-9b11-mouse-mab/2276?site-search-type=Products&N=4294956287&Ntt=2276s&fromPage=plp&\\_requestid=796144](https://www.cellsignal.com/products/primary-antibodies/myc-tag-9b11-mouse-mab/2276?site-search-type=Products&N=4294956287&Ntt=2276s&fromPage=plp&_requestid=796144)

Drp1: [https://www.cellsignal.com/products/primary-antibodies/drp1-d6c7-rabbit-mab/8570?site-search-type=Products&N=4294956287&Ntt=8570s&fromPage=plp&\\_requestid=796353](https://www.cellsignal.com/products/primary-antibodies/drp1-d6c7-rabbit-mab/8570?site-search-type=Products&N=4294956287&Ntt=8570s&fromPage=plp&_requestid=796353)

phospho-AMPK(Thr172): [https://www.cellsignal.com/products/primary-antibodies/phospho-ampka-thr172-40h9-rabbit-mab/2535?site-search-type=Products&N=4294956287&Ntt=2535s&fromPage=plp&\\_requestid=797106](https://www.cellsignal.com/products/primary-antibodies/phospho-ampka-thr172-40h9-rabbit-mab/2535?site-search-type=Products&N=4294956287&Ntt=2535s&fromPage=plp&_requestid=797106)

AMPK: [https://www.cellsignal.com/products/primary-antibodies/ampka-d5a2-rabbit-mab/5831?site-search-type=Products&N=4294956287&Ntt=5831s&fromPage=plp&\\_requestid=797159](https://www.cellsignal.com/products/primary-antibodies/ampka-d5a2-rabbit-mab/5831?site-search-type=Products&N=4294956287&Ntt=5831s&fromPage=plp&_requestid=797159)

RalA: <https://www.bdbiosciences.com/en-eu/products/reagents/microscopy-imaging-reagents/immunofluorescence-reagents/purified-mouse-anti-ral-a.610221>

$\beta$ -Actin: <https://www.ptglab.com/products/Pan-Actin-Antibody-66009-1-Ig.htm>

FLAG: <https://www.ptglab.com/products/Flag-tag-Antibody-66008-4-Ig.htm>

GFP: <https://www.ptglab.com/products/eGFP-Antibody-66002-1-Ig.htm>

Sec5: <https://www.ptglab.com/products/SEC5-Antibody-12751-1-AP.htm>

GLUT4: [https://www.emdmillipore.com/US/en/product/Anti-GLUT-4-Antibody-C-terminus,MM\\_NF-07-1404](https://www.emdmillipore.com/US/en/product/Anti-GLUT-4-Antibody-C-terminus,MM_NF-07-1404)

IRAP: <https://www.cellsignal.com/products/primary-antibodies/irap-d7c5-xp-rabbit-mab/6918>

Na,K-ATPase: <https://www.cellsignal.com/products/primary-antibodies/na-k-atpase-antibody/3010>

## Eukaryotic cell lines

Policy information about [cell lines and Sex and Gender in Research](#)

## Cell line source(s)

3T3-L1 and HEK293T cells were purchased from American Type Culture Collection. LentiX 293T cells were purchased from Takara. Primary cells were freshly isolated in lab and immediately used for experiment. Immortalized primary cells were generated in house, they are named as WT, KO, KO+RalAWT and KO+RalAG23V in the manuscript.

## Authentication

Commercial cell lines were validated by American Type Culture Collection, primary and immortalized cells were validated in the lab (preadipocytes: efficient adipogenesis, LentiX 293: efficient virus production). Those cells were authenticated mainly by their morphology.

## Mycoplasma contamination

Cell lines were not tested for mycoplasma contamination.

Commonly misidentified lines  
(See [ICLAC](#) register)

N/A.

## Animals and other research organisms

Policy information about [studies involving animals](#); [ARRIVE guidelines](#) recommended for reporting animal research, and [Sex and Gender in Research](#)

|                         |                                                                                                                                                                                                    |
|-------------------------|----------------------------------------------------------------------------------------------------------------------------------------------------------------------------------------------------|
| Laboratory animals      | 2-4 months old male mouse with C57BL/6 background were used for in vivo study, 8 weeks old female mouse with C57BL/6 were only used for primary cell isolation.                                    |
| Wild animals            | The study did not involve wild animals.                                                                                                                                                            |
| Reporting on sex        | Physiological and pathological findings in this study only apply to male mice. For C57BL6/J genetic background, only male mice can be induced to metabolic dysfunction with high fat diet feeding. |
| Field-collected samples | The study did not involve samples collected from field.                                                                                                                                            |
| Ethics oversight        | Institutional Animal Care and Use Committee (IACUC) at the University of California San Diego approved and provide guidance on the study protocol.                                                 |

Note that full information on the approval of the study protocol must also be provided in the manuscript.
